# Supplementary figures and images for: Caffeic Acid Targets AMPK Signaling and Regulates Tricarboxylic Acid Cycle Anaplerosis while Metformin Downregulates HIF-1α-Induced Glycolytic Enzymes in Human Cervical Squamous Cell Carcinoma Lines
Source: MDPI journal article supplement (doi:10.3390/nu10070841), 2018-06-28

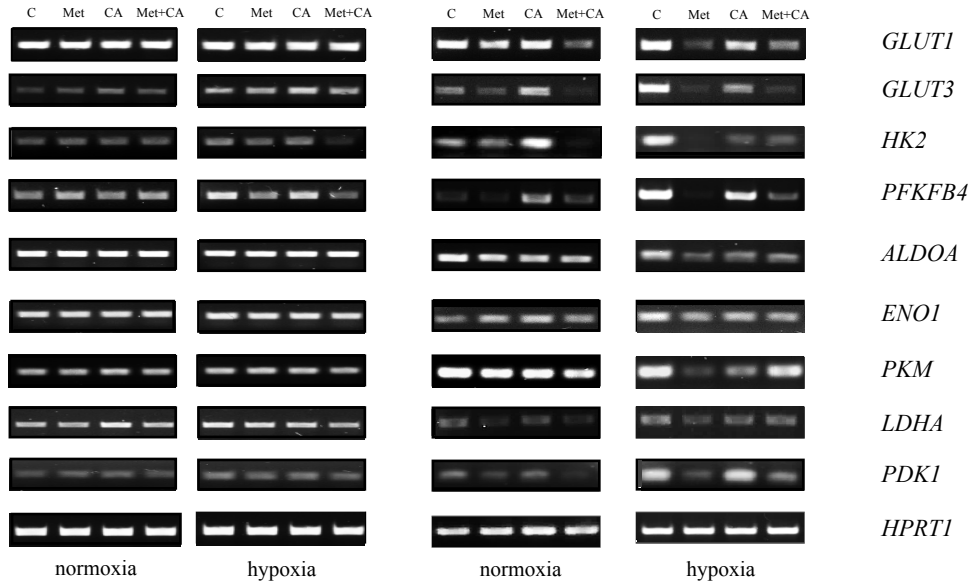

Supplement: s1 [file s1]

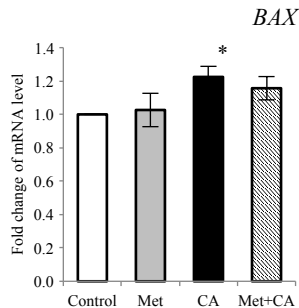

normoxia

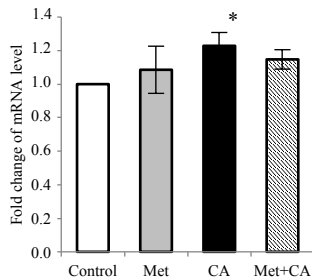

hypoxia

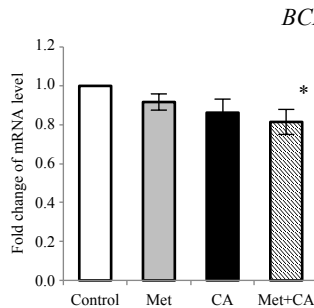

normoxia

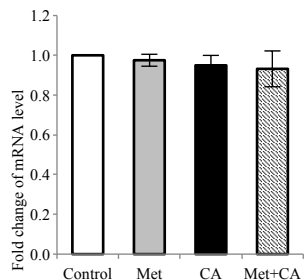

hypoxia

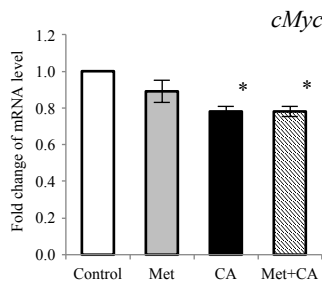

normoxia

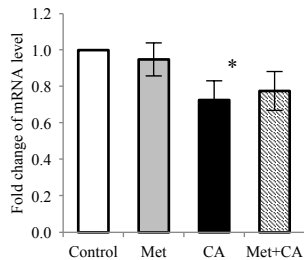

hypoxia

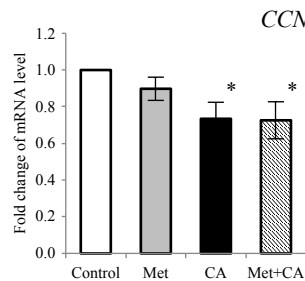

normoxia

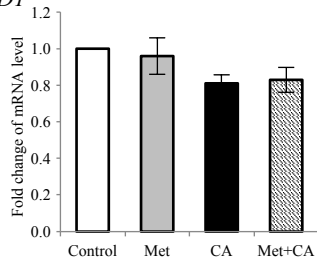

hypoxia

Supplement: s1 [file s1]
